# Supplementary material for: How to overcome Coulomb explosions in labile dications by using the [B12Cl12]2− dianion
Source: Royal Society of Chemistry journal article supplement (doi:10.1039/b908970e), 2009-01-01
Supplement: b908970e.pdf [file b908970e.pdf]

*Supplementary Information*

*to*

**How to overcome Coulomb explosions in labile dications by using  
the  $[\text{B}_{12}\text{Cl}_{12}]^{2-}$  dianion**

*Carsten Knapp,\* Christoph Schulz*

<sup>a</sup> *Institut für Anorganische und Analytische Chemie, Albert-Ludwigs Universität Freiburg, Albertstr. 21,  
79104 Freiburg i. Br., Germany, Fax: +49-761-203-6001, Tel.: +49-761-203-6150, E-mail:  
carsten.knapp@ac.uni-freiburg.de*

### S1. Calculated structures (MP2/def2-TZVPP)

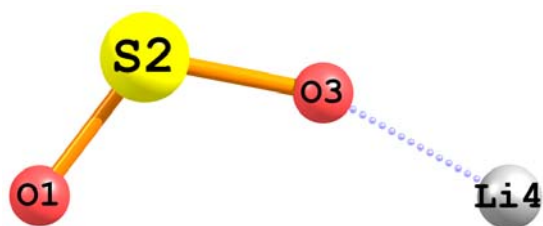

|    |              |              |             |
|----|--------------|--------------|-------------|
| 8  | 1.816752100  | -0.388562900 | 0.000000000 |
| 16 | 0.871798900  | 0.692601200  | 0.000000000 |
| 8  | -0.554673100 | 0.336268400  | 0.000000000 |
| 3  | -2.133878000 | -0.640306700 | 0.000000000 |

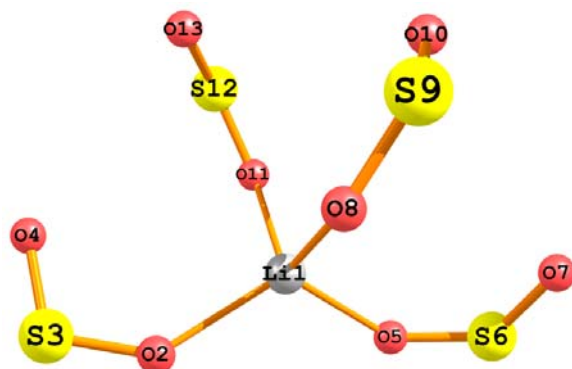

|    |              |              |              |
|----|--------------|--------------|--------------|
| 3  | -0.793854800 | 0.005822000  | 0.038810200  |
| 8  | -1.777719000 | 1.656359500  | 0.503122600  |
| 16 | -1.646987800 | 3.093470500  | 0.272190500  |
| 8  | -0.521296100 | 3.542227200  | -0.512706300 |
| 8  | -1.842776100 | -1.629073700 | -0.330779700 |
| 16 | -1.709789600 | -3.068420400 | -0.115656600 |
| 8  | -0.519036500 | -3.534405600 | 0.554887800  |
| 8  | 0.434552400  | -0.461203300 | 1.532363800  |
| 16 | 1.728527600  | -1.128973800 | 1.665658000  |
| 8  | 2.402364000  | -1.519745200 | 0.450644400  |
| 8  | 0.296549500  | 0.451655500  | -1.563870300 |
| 16 | 1.580940000  | 1.101903200  | -1.819994000 |
| 8  | 2.368526500  | 1.490384000  | -0.674670400 |

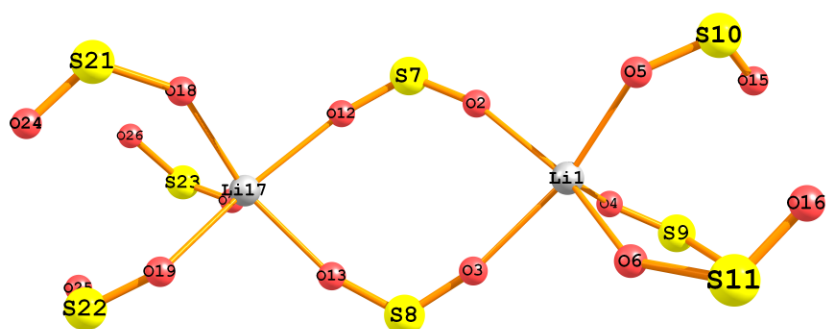

|    |              |              |              |
|----|--------------|--------------|--------------|
| 3  | 2.763279200  | -0.527781700 | 0.065164200  |
| 8  | 1.578128100  | 1.238052100  | -0.347361100 |
| 8  | 0.871400200  | -1.667359100 | -0.410179100 |
| 8  | 3.608559300  | -0.857377200 | -1.718384700 |
| 8  | 4.111086000  | 0.728144300  | 0.964003800  |
| 8  | 3.225500500  | -2.163640300 | 1.199215900  |
| 16 | 0.481071800  | 2.149460000  | -0.619836100 |
| 16 | -0.481071800 | -2.149460000 | -0.619836100 |
| 16 | 4.762407600  | -1.614476500 | -2.208798800 |
| 16 | 5.534911000  | 1.044109900  | 0.844857600  |
| 16 | 4.393094900  | -2.752224600 | 1.857640300  |
| 8  | -0.871400200 | 1.667359100  | -0.410179100 |
| 8  | -1.578128100 | -1.238052100 | -0.347361100 |
| 8  | 5.367771600  | -2.556156300 | -1.298158800 |
| 8  | 6.245434200  | 0.474039000  | -0.275412600 |
| 8  | 5.585014400  | -1.943315500 | 1.947249300  |
| 3  | -2.763279200 | 0.527781700  | 0.065164200  |
| 8  | -3.225500500 | 2.163640300  | 1.199215900  |
| 8  | -4.111086000 | -0.728144300 | 0.964003800  |
| 8  | -3.608559300 | 0.857377200  | -1.718384700 |
| 16 | -4.393094900 | 2.752224600  | 1.857640300  |
| 16 | -5.534911000 | -1.044109900 | 0.844857600  |
| 16 | -4.762407600 | 1.614476500  | -2.208798800 |
| 8  | -5.585014400 | 1.943315500  | 1.947249300  |
| 8  | -6.245434200 | -0.474039000 | -0.275412600 |
| 8  | -5.367771600 | 2.556156300  | -1.298158800 |

## S2. Data used for lattice enthalpy estimations

The thermodynamics for the formation of  $[\text{Li}_2(\text{SO}_2)_8][\text{B}_{12}\text{Cl}_{12}]$  in the solid state were investigated. Reaction enthalpies in the solid state were estimated by Born-Fajans-Haber cycles using the “volume-based” thermodynamics (VBT) approach to access lattice enthalpies (Table S1).<sup>1</sup> The total lattice potential energy,  $U_{\text{pot}}$  of a salt  $\text{M}_p\text{X}_q$  can be estimated from the formula unit volume,  $V_m$ , by:

$$U_{\text{pot}}(\text{M}_p\text{X}_q) = 2I (\alpha V_m^{-1/3} + \beta)$$

where  $V_m$  is the molecular volume (in  $\text{nm}^3$ ),  $I$  is the lattice ionic strength,  $\alpha$  and  $\beta$  are empirical constants. The lattice enthalpy  $\Delta H_L$  was calculated by:

$$\Delta H_L = U_{\text{pot}}(\text{M}_p\text{X}_q) + [p(n_M/2-2) + q(n_X/2-2)] RT$$

where  $n_M$  and  $n_X$  are equal to 3 for monoatomic ions, 5 for linear polyatomic ions, and 6 for polyatomic nonlinear ions.

**Table S1** Molecular volumes [ $\text{nm}^3$ ] and lattice enthalpies [ $\text{kJ/mol}$ ]

|                                                             | $V_m$  | $H_L$ |
|-------------------------------------------------------------|--------|-------|
| $[\text{Li}_2(\text{SO}_2)_8][\text{B}_{12}\text{Cl}_{12}]$ | 0.9114 | 1482  |
| $[\text{Li}(\text{SO}_2)_4]_2[\text{B}_{12}\text{Cl}_{12}]$ | 0.9114 | 851   |

### S3. Solid state packing of $[\text{Li}_2(\text{SO}_2)_8][\text{B}_{12}\text{Cl}_{12}]$

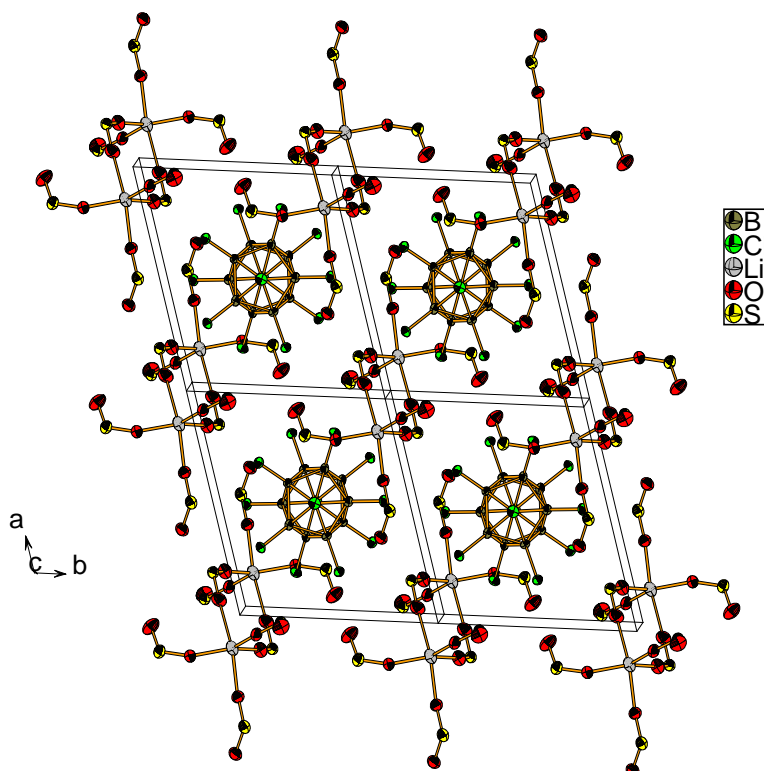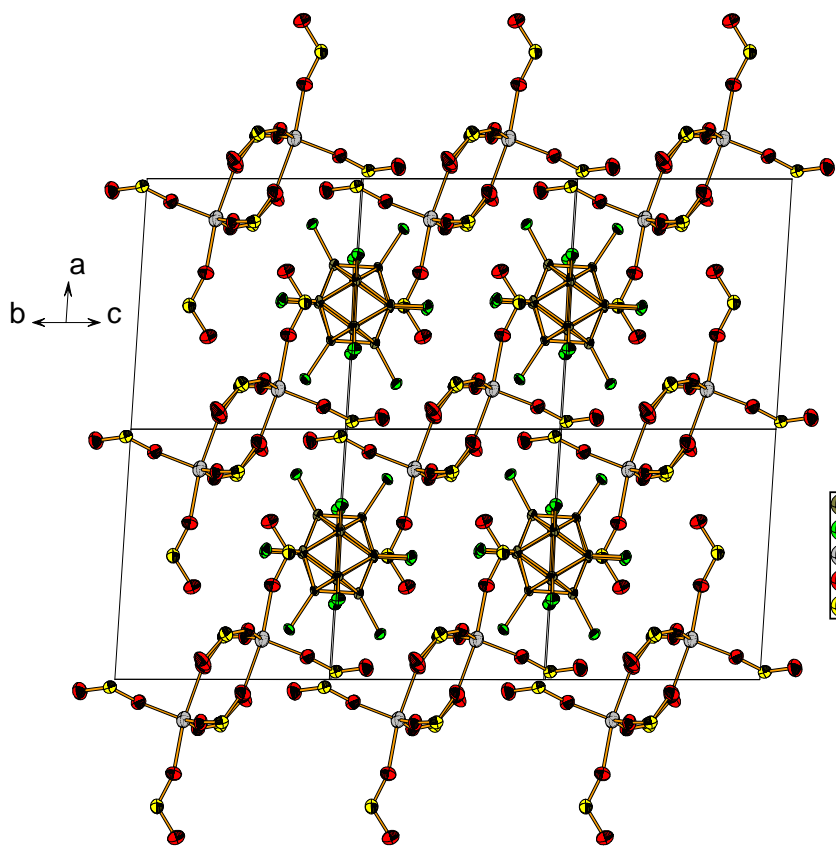

#### S4. Coordination sphere around Li<sup>+</sup> in [Li<sub>2</sub>(SO<sub>2</sub>)<sub>8</sub>]<sup>2+</sup>

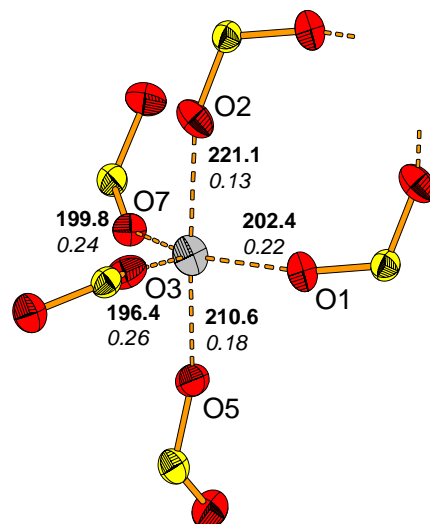

Section of the molecular structure of [Li<sub>2</sub>(SO<sub>2</sub>)<sub>8</sub>]<sup>2+</sup> showing the coordination environment around Li<sup>+</sup> including bond distances [pm, **bold**] and valency units [v.u., *italics*]<sup>2</sup>. Thermal ellipsoids are shown at the 50% probability level. Selected bond angles [°]: O2-Li1-O5 169.3(4), O1-Li1-O3 103.9(3), O3-Li1-O7 115.3(4), O7-Li1-O1 140.8(4), O1-Li1-O2 92.6(3), O1-Li1-O5 88.0(3), O3-Li1-O2 91.8(3), O3-Li1-O5 98.4(3), O7-Li1-O2 86.5(3), O7-Li1-O5 86.3(3). The apical Li-O distances are longer (av. 215.9 pm, 0.15 valency units (v.u.)<sup>2</sup>) than the equatorial Li-O distances (av. 199.5 pm, 0.24 v.u.). The sum of the bond valences around the lithium cation is 1.03 v.u. very close to the theoretical value of 1.

- 
1. a) H. D. B. Jenkins, H. K. Roobottom, J. Passmore and L. Glasser, *Inorg. Chem.*, 1999, **38**, 3609, b) L. Glasser and H. D. B. Jenkins, *Chem. Soc. Rev.*, 2005, **34**, 866.
  2. The contacts (in valency units [v. u.]) have been defined as  $s = \exp[(R_0 - R)/B]$ , where R is the experimental distance, and R<sub>0</sub> and B are constants. (a) I. D. Brown, *The Chemical Bond in Inorganic Chemistry – The Bond Valence Model*, Oxford University Press, Oxford, 2002; (b) [http://ccp14.sims.nrc.ca/ccp/web-mirrors/i\\_d\\_brown/bond\\_valence\\_param/](http://ccp14.sims.nrc.ca/ccp/web-mirrors/i_d_brown/bond_valence_param/).
